# Supplementary material for: A quantum chemical investigation of the electronic structure of thionine
Source: Royal Society of Chemistry journal article supplement (doi:10.1039/c1pp05267e), 2011-12-03
Supplement: c1pp05267e.pdf [file c1pp05267e.pdf]

# A quantum chemical investigation of the electronic structure of thionine<sup>†</sup>

## Electronic Supporting Information

Angela Rodriguez-Serrano,<sup>a</sup> Martha C. Daza,<sup>\*a</sup> Markus Doerr<sup>†b</sup> and Christel M. Marian<sup>‡c</sup>

<sup>a</sup>*Grupo de Bioquímica Teórica, Universidad Industrial de Santander, Carrera 27, Calle 9, Bucaramanga, Colombia.*

<sup>b</sup>*Facultad de Química Ambiental, Universidad Santo Tomás, Carrera 18 No. 9-27, Bucaramanga, Colombia.*

<sup>c</sup>*Institute of Theoretical and Computational Chemistry, Heinrich Heine University of Düsseldorf, Universitätsstr. 1, D-40225 Düsseldorf, Germany.*

---

\*Fax: +57 763 23778, Tel: +57 763 23778; E-mail: [mcdaza@uis.edu.co](mailto:mcdaza@uis.edu.co)

†Fax: +57 76712677, Tel: +57 76800801; E-mail: [markusdoerr@gmx.de](mailto:markusdoerr@gmx.de)

‡Fax: +49 (0)211 8113466, Tel: +49 (0)211 8113209; E-mail: [Christel.Marian@uni-duesseldorf.de](mailto:Christel.Marian@uni-duesseldorf.de)

†Geometries and vibrational frequencies of the ground and excited states are provided as molden files: S0.molden, S1.molden, S2.molden, T1.molden, T2.molden, T3.molden.

**Fig. 1** DFT/MRCI energies of the low-lying states of thionine along a linearly interpolated path between the  $S_0$  and  $S_1$  geometries. The singlet profiles are represented by solid lines and the triplet profiles by dashed lines.

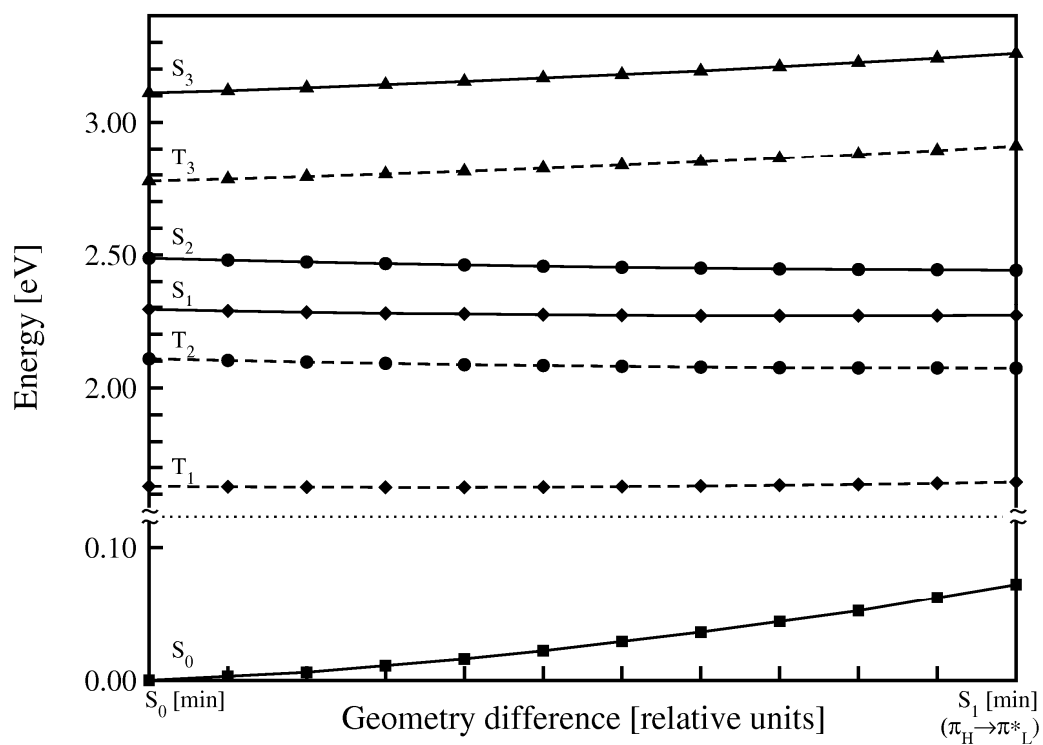

**Fig. 2** Frontier B3LYP/TZVP Kohn-Sham molecular orbitals computed at the  $T_3$  ( $n \rightarrow \pi^*$ ) state minimum (isovalue 0.03) of thionine.

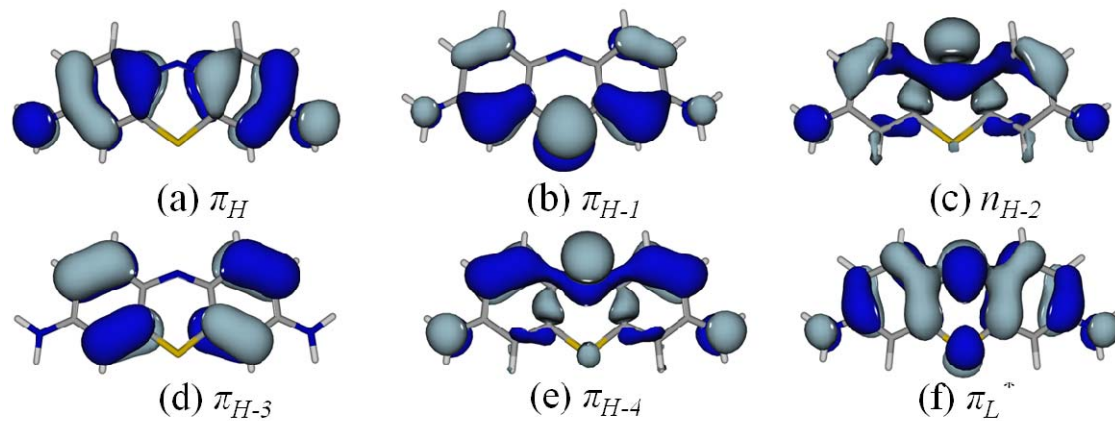

**Table 1** Selected geometrical parameters of the thionine ground state calculated with the B3LYP functional and the TZVP, TZVPP and TZVP+R basis sets. Bond lengths are reported in Å and angles in degrees (°).

| Parameter                    | TZVP  | TZVPP | TZVP+R |
|------------------------------|-------|-------|--------|
| <i>r</i> (C(11)-C(12))       | 1.358 | 1.357 | 1.358  |
| <i>r</i> (C(12)-C(13))       | 1.429 | 1.428 | 1.429  |
| <i>r</i> (C(11)-C(3))        | 1.430 | 1.428 | 1.430  |
| <i>r</i> (N(4)-C(3))         | 1.330 | 1.329 | 1.331  |
| <i>r</i> (C(3)-C(2))         | 1.438 | 1.437 | 1.437  |
| <i>r</i> (C(2)-C(14))        | 1.380 | 1.380 | 1.380  |
| <i>r</i> (C(2)-S(1))         | 1.751 | 1.738 | 1.750  |
| <i>r</i> (C(13)-C(14))       | 1.408 | 1.406 | 1.408  |
| <i>r</i> (C(13)-N(15))       | 1.345 | 1.344 | 1.346  |
| <i>r</i> (N(18)-H(19))       | 1.007 | 1.005 | 1.007  |
| <i>r</i> (N(18)-H(20))       | 1.007 | 1.005 | 1.007  |
| $\theta$ (S(1)-C(6)-C(7))    | 118.3 | 118.4 | 118.2  |
| $\theta$ (S(1)-C(6)-C(5))    | 120.6 | 120.6 | 120.7  |
| $\theta$ (C(2)-S(1)-C(6))    | 103.1 | 103.6 | 103.1  |
| $\theta$ (N(4)-C(5)-C(10))   | 117.2 | 117.3 | 117.2  |
| $\theta$ (N(4)-C(5)-C(6))    | 125.7 | 125.5 | 125.6  |
| $\theta$ (C(3)-N(4)-C(5))    | 124.3 | 124.3 | 124.3  |
| $\theta$ (C(6)-C(7)-C(8))    | 120.3 | 120.3 | 120.3  |
| $\theta$ (C(5)-C(10)-C(9))   | 121.8 | 121.8 | 121.8  |
| $\theta$ (C(5)-C(6)-C(7))    | 121.1 | 121.1 | 121.1  |
| $\theta$ (C(10)-C(5)-C(6))   | 117.2 | 117.2 | 117.2  |
| $\theta$ (C(8)-C(9)-C(10))   | 120.3 | 120.3 | 120.3  |
| $\theta$ (C(7)-C(8)-C(9))    | 119.4 | 119.4 | 119.3  |
| $\theta$ (N(18)-C(8)-C(9))   | 119.8 | 119.7 | 119.8  |
| $\theta$ (N(18)-C(8)-C(7))   | 120.9 | 120.9 | 120.9  |
| $\theta$ (C(8)-N(18)-H(19))  | 121.2 | 121.1 | 121.2  |
| $\theta$ (C(8)-N(18)-H(20))  | 121.7 | 121.6 | 121.7  |
| $\theta$ (H(19)-N(18)-H(20)) | 117.1 | 117.3 | 117.1  |

**Table 2** Vertical singlet and triplet excitation energies  $\Delta E$  (eV) of thionine calculated using the TZVP+R and the TZVP basis sets.

| Electronic State                                 | Electronic Structure <sup>a</sup>                                                                                                                                                                                      | DFT/MRCI                                   | DFT/MRCI                                 | DFT/MRCI                               | TD-B3LYP/TZVP+R//<br>B3LYP<br>/TZVP+R <sup>b</sup> | TD-B3LYP/TZVP//<br>B3LYP<br>/TZVP <sup>b</sup> |
|--------------------------------------------------|------------------------------------------------------------------------------------------------------------------------------------------------------------------------------------------------------------------------|--------------------------------------------|------------------------------------------|----------------------------------------|----------------------------------------------------|------------------------------------------------|
|                                                  |                                                                                                                                                                                                                        | /TZVP+R//<br>B3LYP<br>/TZVP+R <sup>b</sup> | /TZVP//<br>B3LYP<br>/TZVP+R <sup>b</sup> | /TZVP//<br>B3LYP<br>/TZVP <sup>b</sup> |                                                    |                                                |
| S <sub>0</sub> (1 <sup>1</sup> A <sub>1</sub> )  | (0.93) Ground State                                                                                                                                                                                                    |                                            |                                          |                                        |                                                    |                                                |
| S <sub>1</sub> (1 <sup>1</sup> B <sub>1</sub> )  | (0.80) $\pi_{\text{H}} \rightarrow \pi_{\text{L}}^*$                                                                                                                                                                   | 2.29(0.832)                                | 2.29(0.831)                              | 2.29(0.833)                            | 2.74(0.612)                                        | 2.74(0.613)                                    |
| S <sub>2</sub> (2 <sup>1</sup> A <sub>1</sub> )  | (0.82) $\pi_{\text{H}-1} \rightarrow \pi_{\text{L}}^*$                                                                                                                                                                 | 2.49(0.012)                                | 2.48(0.012)                              | 2.49(0.012)                            | 2.72(0.010)                                        | 2.73(0.010)                                    |
| S <sub>3</sub> (1 <sup>1</sup> B <sub>2</sub> )  | (0.79) $n_{\text{H}-4} \rightarrow \pi_{\text{L}}^*$                                                                                                                                                                   | 3.12(0.003)                                | 3.11(0.003)                              | 3.11(0.003)                            | 3.21(0.001)                                        | 3.21(0.001)                                    |
| S <sub>4</sub> (3 <sup>1</sup> A <sub>1</sub> )  | (0.52) $\pi_{\text{H}-2} \rightarrow \pi_{\text{L}}^*$<br>(0.21) $\pi_{\text{H}} \rightarrow \pi_{\text{L}}^* \pi_{\text{H}} \rightarrow \pi_{\text{L}}^*$                                                             | 3.55(0.014)                                | 3.56(0.014)                              | 3.56(0.014)                            | 4.03(0.002) <sup>c</sup>                           | 4.03(0.002) <sup>c</sup>                       |
| :                                                | :                                                                                                                                                                                                                      | :                                          | :                                        | :                                      | :                                                  | :                                              |
| S <sub>8</sub> (4 <sup>1</sup> A <sub>1</sub> )  | (0.64) $\pi_{\text{H}} \rightarrow \pi_{\text{L}+1}^*$                                                                                                                                                                 | 4.37(0.132)                                | 4.37(0.133)                              | 4.37(0.133)                            | 4.53(0.088)                                        | 4.53(0.089)                                    |
| S <sub>9</sub> (3 <sup>1</sup> B <sub>1</sub> )  | (0.50) $\pi_{\text{H}} \rightarrow \pi_{\text{L}+2}^*$<br>(0.23) $\pi_{\text{H}-1} \rightarrow \pi_{\text{L}+1}^*$                                                                                                     | 4.41(0.044)                                | 4.42(0.058)                              | 4.42(0.056)                            | 4.61(0.024)                                        | 4.62(0.027)                                    |
| S <sub>10</sub> (4 <sup>1</sup> B <sub>1</sub> ) | (0.34) $\pi_{\text{H}-1} \rightarrow \pi_{\text{L}}^* \pi_{\text{H}} \rightarrow \pi_{\text{L}}^*$<br>(0.20) $\pi_{\text{H}-1} \rightarrow \pi_{\text{L}+1}^*$                                                         | 4.57(0.532)                                | 4.57(0.526)                              | 4.57(0.526)                            | 5.02(1.063) <sup>d</sup>                           | 5.02(1.058) <sup>d</sup>                       |
| :                                                | :                                                                                                                                                                                                                      | :                                          | :                                        | :                                      | :                                                  | :                                              |
| S <sub>12</sub> (5 <sup>1</sup> B <sub>1</sub> ) | (0.33) $\pi_{\text{H}-5} \rightarrow \pi_{\text{L}}^*$<br>(0.14) $\pi_{\text{H}} \rightarrow \pi_{\text{L}}^* \pi_{\text{H}} \rightarrow \pi_{\text{L}+1}^*$<br>(0.12) $\pi_{\text{H}} \rightarrow \pi_{\text{L}+2}^*$ | 4.89(0.199)                                | 4.89(0.200)                              | 4.90(0.201)                            | 5.48(0.008) <sup>e</sup>                           | 5.50(0.010) <sup>e</sup>                       |
| T <sub>1</sub> (1 <sup>3</sup> B <sub>1</sub> )  | (0.92) $\pi_{\text{H}} \rightarrow \pi_{\text{L}}^*$                                                                                                                                                                   | 1.63                                       | 1.63                                     | 1.63                                   | 1.51                                               | 1.53                                           |
| T <sub>2</sub> (1 <sup>3</sup> A <sub>1</sub> )  | (0.88) $\pi_{\text{H}-1} \rightarrow \pi_{\text{L}}^*$                                                                                                                                                                 | 2.11                                       | 2.10                                     | 2.11                                   | 2.01                                               | 2.03                                           |
| T <sub>3</sub> (1 <sup>3</sup> B <sub>2</sub> )  | (0.81) $n_{\text{H}-4} \rightarrow \pi_{\text{L}}^*$                                                                                                                                                                   | 2.78                                       | 2.77                                     | 2.78                                   | 2.60                                               | 2.61                                           |
| T <sub>4</sub> (2 <sup>3</sup> A <sub>1</sub> )  | (0.78) $\pi_{\text{H}-2} \rightarrow \pi_{\text{L}}^*$                                                                                                                                                                 | 3.12                                       | 3.12                                     | 3.12                                   | 3.00                                               | 3.01                                           |

<sup>a</sup> Dominant contributions at the DFT/MRCI/TZVP level in parentheses. <sup>b</sup> Oscillator strengths (length form) in parentheses. <sup>c</sup> The dominant contribution of these states is a combination of two single excitations:  $\pi_{\text{H}-2} \rightarrow \pi_{\text{L}}^*$  and  $\pi_{\text{H}} \rightarrow \pi_{\text{L}+1}^*$ . <sup>d</sup> The dominant contribution of these states is a combination of two single excitations:  $\pi_{\text{H}-1} \rightarrow \pi_{\text{L}+1}^*$  and  $\pi_{\text{H}} \rightarrow \pi_{\text{L}+2}^*$ . <sup>e</sup> The dominant contribution of these states is a single excitation:  $\pi_{\text{H}-5} \rightarrow \pi_{\text{L}}^*$ .

**Table 3** DFT/MRCI energies ( $\Delta E$ ), Oscillator strengths ( $f(L)$ ) and dominant contributions (DC) for each of the linearly interpolated geometries between the  $S_1$  and the  $S_2$  minima calculated at the DFT/MRCI/TZVP level.

| Step  | $S_1$      |        |                                       |                                       | $S_2$      |        |                                       |                                       |
|-------|------------|--------|---------------------------------------|---------------------------------------|------------|--------|---------------------------------------|---------------------------------------|
|       | $\Delta E$ | $f(L)$ | DC<br>$\pi_{H-1} \rightarrow \pi_L^*$ | DC<br>$\pi_{H-1} \rightarrow \pi_L^*$ | $\Delta E$ | $f(L)$ | DC<br>$\pi_{H-1} \rightarrow \pi_L^*$ | DC<br>$\pi_{H-1} \rightarrow \pi_L^*$ |
| $S_1$ | 2.270      | 0.790  | 0.800                                 | -                                     | 2.44       | 0.010  | 0.815                                 | -                                     |
| 1     | 2.269      | 0.790  | 0.799                                 | -                                     | 2.42       | 0.011  | 0.815                                 | -                                     |
| 2     | 2.269      | 0.787  | 0.796                                 | -                                     | 2.41       | 0.015  | 0.813                                 | -                                     |
| 3     | 2.271      | 0.777  | 0.789                                 | -                                     | 2.39       | 0.025  | 0.806                                 | -                                     |
| 4     | 2.274      | 0.758  | 0.774                                 | -                                     | 2.38       | 0.045  | 0.792                                 | 0.024                                 |
| 5     | 2.277      | 0.722  | 0.746                                 | 0.053                                 | 2.37       | 0.081  | 0.764                                 | 0.051                                 |
| 6     | 2.281      | 0.664  | 0.698                                 | 0.101                                 | 2.37       | 0.139  | 0.716                                 | 0.098                                 |
| 7     | 2.284      | 0.582  | 0.630                                 | 0.171                                 | 2.37       | 0.221  | 0.646                                 | 0.166                                 |
| 8     | 2.287      | 0.488  | 0.549                                 | 0.254                                 | 2.38       | 0.315  | 0.563                                 | 0.246                                 |
| 9     | 2.385      | 0.404  | 0.323                                 | 0.484                                 | 2.29       | 0.399  | 0.334                                 | 0.472                                 |
| 10    | 2.400      | 0.476  | 0.385                                 | 0.420                                 | 2.29       | 0.327  | 0.398                                 | 0.410                                 |
| $S_2$ | 2.419      | 0.533  | 0.432                                 | 0.371                                 | 2.3        | 0.269  | 0.448                                 | 0.362                                 |
